## RESEARCH ARTICLE

# Effect of menstrual irregularity on academic performance of undergraduate students of Debre Berhan University: A comparative cross sectional study

Enguday Demeke<sup>1\*</sup>, Abayneh Birlie Zeru<sup>1</sup>, Esubalew Tesfahun<sup>2</sup>, Woineshet Bedru Mohammed<sup>1</sup>

**1** Department of Public Health, Debre Berhan University, Addis Abeba, Ethiopia, **2** Public Health, Director Medicine and Health Science Institute, Debre Berhan University, Addis Abeba, Ethiopia

\* [engudem38@gmail.com](mailto:engudem38@gmail.com)

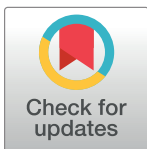

## Abstract

### Background

Menstrual period is a critical time in the life of females. For the first few years after menarche, irregular cycle is common due to premature hypothalamic-pituitary ovarian (HPO) axis physiologically. If persistent, it becomes a major problem in student's life. But few studies conducted on effect of menstrual cycle irregularity on academic performance among university students were descriptive. However assessing the effect of menstrual irregularity on academic performance by using average grade point approach is critically important to magnify its effect.

### Objective

To compare effects of menstrual irregularity on academic performance among undergraduate students of Debre Berhan University, Ethiopia 2020.

### Methods

A comparative cross sectional study was conducted among 404 students in Debre Berhan University, Ethiopia, 2020. A standard tool of menstrual cycle regularity which is prepared by international federation of gynecologist and obstetrics (IFGO) was used to screen students who have menstrual irregularity. Independent sample t- test was done to compare the mean difference of academic performance between the two groups of students.

### Results

The age of study participants ranges between 18 and 26 years with a mean age of  $20.69 \pm 1.43$  years. The mean age at menarche was  $14.9 \pm 1.67$  ranging from 9 to 18 years. Students who had menstrual irregularity had mean average grade point (AGP) of  $(2.78 \pm 0.57)$  and students who had regular menstruation had mean AGP of  $(2.97 \pm 0.53)$ . Students who

## OPEN ACCESS

**Citation:** Demeke E, Zeru AB, Tesfahun E, Mohammed WB (2023) Effect of menstrual irregularity on academic performance of undergraduate students of Debre Berhan University: A comparative cross sectional study. PLoS ONE 18(1): e0280356. <https://doi.org/10.1371/journal.pone.0280356>

**Editor:** Dragan Pamucar, University of Belgrade Faculty of Organisational Sciences: Univerzitet u Beogradu Fakultet organizacionih nauka, SERBIA

**Received:** April 9, 2021

**Accepted:** December 28, 2022

**Published:** January 26, 2023

**Copyright:** © 2023 Demeke et al. This is an open access article distributed under the terms of the [Creative Commons Attribution License](https://creativecommons.org/licenses/by/4.0/), which permits unrestricted use, distribution, and reproduction in any medium, provided the original author and source are credited.

**Data Availability Statement:** All relevant data are within the manuscript and its [Supporting information](#) files.

**Funding:** The authors received no specific funds for this work.

**Competing interests:** the authors have declared that no competing interests exist.

**Abbreviations:** AGP, Average Grade Point; DBU, Debre Berhan University; IFGO, International Federation of Gynecologists and Obstetrics.

had menstrual irregularity had lower mean average grade point by a mean difference of 0.19 (95%CI: 0.09–0.30).

## Conclusion

This study found that students who had menstrual irregularity had significantly lower mean AGP as compared with students who had regular menstruation.

## Introduction

Regular menstrual cycle (counting from the first day of one menstrual period to the first day of the next cycle) is 21 to 35 days and lasts from 3 to 7 days duration with volume of blood loss 5–80 ml [1]. Menstrual irregularity refer to any kind of changes occurring in regularity of onset, frequency of onset, duration of flow and volume from regular menstrual cycle [2–4].

Menstrual period has a notable effect on the academic performance of female students [5]. It influences social life, diet, exercise, amount of sleep, sleep quality, study time, concentration, group activities, preparation and performance on exam and attendance [6, 7]. Different studies showed that academic performance of women varies during their menstrual cycle, in a way that the mental status is decreased during and several days before the period [8, 9]. In addition, another study conducted in Saudi Arabia revealed that there was an increase rate of absenteeism and loss of concentration in academic work which might have impact on school performances as well as the achievement of their life goals [10]. Study conducted in Mansoura University revealed that more than two third of nursing students had sleeping desire during lectures [11].

The majority of researches regarding effect of menstrual irregularity have been focused on daily activities and descriptive. However assessing the effect of menstrual irregularity on academic performance by using average grade point approach is critically important. Therefore, the aim of this study was to compare the effect of menstrual irregularity on academic performance by using average grade result of the last semester among Debre Berhan university students.

## Methods

### Study design, settings and participants

Institutional based comparative cross sectional study design was conducted in Debre Berhan University from February 11 to March 10 /2020. Debre Berhan is located at 130 Kms from Addis Ababa (capital city of Ethiopia) and at 695 kms from Bahir Dar (the capital city of Amhara Region). There were about 5387 female students during the study period. Undergraduate regular students who were pregnant, who were within one year after delivery and lactating, who had treatment history for menstrual irregularity during the year of study and who were critically ill during data collection period were excluded from the study.

### Sample size and sampling procedures

The sample size was calculated using a formula for estimation of double population proportion with the assumption of small to medium effect sizes (Cohen's  $d = 0.05$ ), 95% confidence interval and a power of 80%. 202 students who have irregular menstrual cycle and 202 students

who had regular menstrual cycle were included in the study. The study subjects were selected using simple random sampling (lottery method) technique from the list of the students.

### Data collection tools and procedures

A pretested self-administered questioner was used to collect the data. The questionnaire includes socio demographic questions, menstrual cycle pattern related questions, menstrual related symptoms questions, problems faced during menses questions and average grade point of the last semester taken from the students register. The questionnaire was first prepared in English, and translated into Amharic language. A person who was expert in both languages checked the questionnaires' consistency. Two data collectors (graduated public health) and one supervisor (master of public health student) was participated throughout the data collection process.

### Measures

**Outcome.** The investigators want to compare the average grade point of students who have menstrual cycle irregularity with students who have menstrual cycle regularity. In order to assure the comparison similar in academic year only the last one semester average grade point was taken for all students who have regular and irregular menstrual cycle.

**Predictors.** Whether menstrual cycle is regular or irregular should be determined by using standards of menstrual irregularity definition which was prepared by international federation of gynecology and obstetrics (IFGO) 2018. Therefore, in the present study regular menstrual cycle was defined as if frequency of menses is 24–38 days, duration of bleeding less than or equal to 8 days, cycle to cycle variation over the last one year be less than 10 days and if the individual perception on amount is normal [12]. On the other hand menstrual irregularity refers to anything outside regular menstrual cycle limit.

### Data analysis

Epi-data version 3.1 was used for data entry and exported to SPSS version 21 software for analysis. Normality test (by using Kolmogorov-Simonov and Shapiro-wilk test), homogeneity of variance (by using Levene's test) were done. Out layer detection was done by using box and whisker plot. Descriptive statistics such as frequency and percentage were computed for categorical variables. Continuous variables were presented as mean  $\pm$  standard deviation or median. Independent sample t- test was done to compare the mean difference of academic performance between the two groups of students.

## Results

### Socio-demographic characteristics

The average age of the students was  $20.69 \pm 1.43$  years old with a range of 18–26. Half of respondents 203 (50.20%) came from rural area and 346 (85.60%) of study participants were orthodox Christian followers (Table 1).

### Menstruation and menstrual irregularity

The mean menarcheal age of study subjects was  $14.90 \pm 1.67$  ranging from 9 to 18 years. The average duration of the menstrual cycle lasted between 2–12 days with a mean of  $4.84 \pm 1.81$  days.

Among menstrual irregularities, (those who have menstrual cycle length  $<24$  days, menstrual cycle length  $> 38$  days, inter menstrual difference  $> 10$  days, perception on menstrual

**Table 1. Socio-demographic characteristics of undergraduate female students of DBU, Ethiopia participated in the study, 2020 (N = 404).**

| Variables                             |            | Frequency | Percent % |
|---------------------------------------|------------|-----------|-----------|
| Age                                   | 18–20      | 209       | 51.73     |
|                                       | 21–22      | 179       | 44.31     |
|                                       | 23–26      | 16        | 3.96      |
| Ethnicity                             | Amhara     | 298       | 73.76     |
|                                       | Oromo      | 68        | 16.83     |
|                                       | SNNP       | 16        | 3.96      |
|                                       | Tigrie     | 17        | 4.21      |
|                                       | Others     | 5         | 1.24      |
| Residence before university admission | Urban      | 201       | 49.75     |
|                                       | Rural      | 203       | 50.25     |
| Religion                              | Orthodox   | 346       | 85.64     |
|                                       | Protestant | 30        | 7.43      |
|                                       | Muslim     | 27        | 6.68      |
|                                       | Others     | 1         | 0.25      |
| Marital status                        | Single     | 376       | 93.07     |
|                                       | Married    | 26        | 6.44      |
|                                       | Others     | 2         | 0.50      |
| Birr sent from family per month       | <3USD      | 88        | 21.78     |
|                                       | 3-6USD     | 116       | 28.71     |
|                                       | ≥6USD      | 200       | 49.50     |

<https://doi.org/10.1371/journal.pone.0280356.t001>

blood flow light, perception on menstrual blood flow heavy and menstrual blood flow duration > 8 days), irregular onset was the major problem 123 (30.45%). Light menstrual flow, heavy menstrual flow, prolonged period, frequent period and infrequent period accounts in 116 (28.71%), 80 (19.80%), 24 (5.94%), 23 (5.69%) and 3 (0.74%), respectively (Table 2).

### Menstrual related symptoms

The majority experienced symptoms during their menstrual period were abdominal cramps 285 (70.54%), back pain 139 (34.41%), disappointment 94(23.27%) (Table 3).

**Table 2. Pattern of menstrual cycle among undergraduate students of DBU, Ethiopia, participated in the study, 2020 (N = 404).**

| Variables                                        |                       | Frequency | Percent (%) |
|--------------------------------------------------|-----------------------|-----------|-------------|
| Length of menstrual cycle                        | <24 days              | 23        | 5.69        |
|                                                  | 24–38 days            | 204       | 50.50       |
|                                                  | >38 days              | 3         | 0.74        |
| Regularity of onset / Inter menstrual difference | Regular (<10 days)    | 51        | 12.62       |
|                                                  | Irregular (≥ 10 days) | 123       | 30.45       |
| Menstrual blood flow duration                    | ≤8 days               | 380       | 94.10       |
|                                                  | >8 days               | 24        | 5.94        |
| Perception on menstrual blood flow               | Light                 | 116       | 28.71       |
|                                                  | Normal                | 208       | 51.49       |
|                                                  | Heavy                 | 80        | 19.80       |
| Over all menstrual cycle                         | Irregular             | 202       | 50          |
|                                                  | Regular               | 202       | 50          |

<https://doi.org/10.1371/journal.pone.0280356.t002>

**Table 3. Menstrual related symptoms occur during menses among undergraduate students of DBU, Ethiopia, participated in the study, 2020 (N = 404).**

| Symptom          | Number | Percentage (%) |
|------------------|--------|----------------|
| abdominal cramps | 285    | 70.54          |
| back pain        | 139    | 34.41          |
| Disappointment   | 94     | 23.27          |
| Headache         | 85     | 21.04          |
| Nausea           | 69     | 17.08          |
| Depression       | 67     | 16.58          |
| Vomiting         | 34     | 8.41           |

<https://doi.org/10.1371/journal.pone.0280356.t003>

Related with symptoms, 180 (44.55%) students passed the time without any problem. Others 224(55.45%) students faced different problems. From them 126 (56.25%) had problem of attention in the class (Table 4).

### Effect of menstrual irregularity on academic performance

The mean average grade point (AGP) of study participants was 2.88 with (SD  $\pm$ 0.57). Furthermore, 45% of students had an average grade point above the mean. Students who had menstrual irregularity had mean AGP of (2.78  $\pm$  0.57) and students who had regular menstruation had mean AGP of (2.97  $\pm$  0.53) (Table 5).

This study found that students who had menstrual irregularity had significantly lower mean average grade point by a mean difference of 0.19 (95%CI: 0.08–0.30) as compared with students who had regular menstruation (Table 5).

### Discussion

The implications of reproductive health on quality of life and other activities are many. This study examines the association between menstrual cycle and academic performance among undergraduate students of Debre Berhan University. In the present study 56.25% of students had no attention in the class, 31.69% were absent from class, 33.48% decrease class activity, 46.43% had low grade achievement and 5.36% were absent from exam during menses. Moreover, students which had menstrual irregularity had significantly lower mean average grade result as compared with students who had regular menstruation.

This is in accordance to the Arabian study, which showed that academic performance was affected by menstruation in several ways, mainly study time (76%), concentration (65.8%),

**Table 4. Problems face during menses among undergraduate students of DBU, Ethiopia participated in the study 2020 (N = 224).**

| Problem                   | Categories | Number | Percent (%) |
|---------------------------|------------|--------|-------------|
| No attention in the class | Yes        | 126    | 56.25       |
|                           | No         | 98     | 43.75       |
| Absent from class         | Yes        | 71     | 31.69       |
|                           | No         | 153    | 68.30       |
| Decrease class activity   | Yes        | 75     | 33.48       |
|                           | No         | 149    | 66.52       |
| Low grade achievement     | Yes        | 104    | 46.43       |
|                           | No         | 120    | 53.57       |
| Absent from exam          | Yes        | 12     | 5.36        |
|                           | No         | 212    | 94.64       |

<https://doi.org/10.1371/journal.pone.0280356.t004>

Table 5. Effect of menstrual irregularity on academic performance of undergraduate students of DBU, Ethiopia 2020.

| Variable     |           | Frequency | Mean AGP | Mean difference | 95%CI of mean AGP | p value | Std. Deviation | Mean+Std  |
|--------------|-----------|-----------|----------|-----------------|-------------------|---------|----------------|-----------|
| Menstruation | Regular   | 202       | 2.97     | 0.19            | (0.08–0.30)       | 0.001   | 0.53           | 2.97+0.57 |
|              | Irregular | 202       | 2.78     |                 |                   |         | 0.57           | 2.78+0.57 |

<https://doi.org/10.1371/journal.pone.0280356.t005>

participation in group activities (58.1%), examination performance (51.8%) and class attendance (40.8%) [12].

Another study conducted in Mansoura University revealed that 79.5% of nursing students had sleeping desire during lectures, 78.7% experienced restrictions in practical performance, 77.5% had difficulty in concentration and understanding and 75.1%, decreased participation in discussion. In addition study conducted in Kuwait study 75.5% of the participants perceived menstrual discomfort as having negative effects on their participation [13]. A study conducted on the effects of the different phases of the menstrual cycle on physical working capacity showed that the female resting heart and respiratory rates were decrease during the menstrual cycle which have adverse effects on physical work output and sport participation [14].

Our study has limitations to consider when interpreting results. First most data on the participant's questioner were self-reported even Average grade result so social desirability bias may be present.

## Conclusion

It can be concluded that menstrual irregularity has a major impact on students' academic performance. This study found that students who had menstrual irregularity had significantly lower mean average grade point as compared with students who had regular menstruation. But this study give insight about the effect of menstrual irregularity on academic performance, further research should be conducted to study the effect of menstrual irregularity on academic performance on university students.

## Supporting information

**S1 Data. Data collected data from Debre Berhan university undergraduate students to assess the effect of menstrual irregularity on academic performance 2020.**

(SAV)

**S1 File. Questioner used to assess the effect of menstrual irregularity on academic performance 2020.**

(DOCX)

## Acknowledgments

The authors greatly appreciate the cooperation and support of all participants, and are grateful to data collectors and supervisors.

## Author Contributions

**Conceptualization:** Enguday Demeke.

**Formal analysis:** Enguday Demeke, Esubalew Tesfahun.

**Investigation:** Enguday Demeke, Abayneh Birlie Zeru, Esubalew Tesfahun.

**Methodology:** Enguday Demeke, Abayneh Birlie Zeru, Esubalew Tesfahun.

**Resources:** Abayneh Birlie Zeru, Esubalew Tesfahun, Woineshet Bedru Mohammed.

**Supervision:** Enguday Demeke, Esubalew Tesfahun, Woineshet Bedru Mohammed.

**Writing – original draft:** Woineshet Bedru Mohammed.

## References

1. Sharma S., Deuja S., and Saha C., Menstrual pattern among adolescent girls of Pokhara Valley: a cross sectional study. *BMC women's health*, 2016. 16(1): p. 1–6. <https://doi.org/10.1186/s12905-016-0354-y> PMID: 27938370
2. Larramendy, M. and S. Soloneski, *Chromosomal Abnormalities: A Hallmark Manifestation of Genomic Instability*. 2017: BoD—Books on Demand.
3. Mahmood M. and Jabeen N., Pattern of menstrual irregularities amongst women presenting to gynaecological outpatient department. *Journal of Islamabad Medical and Dental College*, 2013. 2(1): p. 9–12.
4. Nam G.E., Han K., and Lee G., Association between sleep duration and menstrual cycle irregularity in Korean female adolescents. *Sleep medicine*, 2017. 35: p. 62–66. <https://doi.org/10.1016/j.sleep.2017.04.009> PMID: 28619183
5. Boyle G.J., Effects of menstrual cycle moods and symptoms on academic performance: a study of senior secondary school students. *British journal of educational psychology*, 1997. 67(1): p. 37–49. <https://doi.org/10.1111/j.2044-8279.1997.tb01225.x> PMID: 9114730
6. Gujarathi J., Jani D., and Murthi A., Prevalance of menstrual disorders in hostellers and its effect on education—a cross sectional study. *World Journal of Pharmaceutical Research*, 2014. 3(2): p. 4060–4065.
7. Khamdan H., et al., The impact of menstrual period on physical condition, academic performance and habits of medical students. *J Womens Health Care*, 2014. 3: p. 185.
8. Bodat S., Ghate M.M., and Majumdar J.R., School absenteeism during menstruation among rural adolescent girls in Pune. *Natl J Community Med*, 2013. 4(2): p. 212–6.
9. Koushkie Jahromi M., Gaeini A., and Rahimi Z., Influence of a physical fitness course on menstrual cycle characteristics. *Gynecological endocrinology*, 2008. 24(11): p. 659–662. <https://doi.org/10.1080/09513590802342874> PMID: 19031225
10. Karout N., Prevalence and pattern of menstrual problems and relationship with some factors among Saudi nursing students. *Journal of Nursing Education and practice*, 2015. 5(12): p. 1–8.
11. Elnagar R.R., Elmashed H.A.M., and Kheder N.F.H., Menstrual disorders: incidence and its effect on students' academic performance. *International Journal of Nursing Didactics*, 2017. 7(3): p. 27–37.
12. Munro M.G., et al., The two FIGO systems for normal and abnormal uterine bleeding symptoms and classification of causes of abnormal uterine bleeding in the reproductive years: 2018 revisions. *International Journal of Gynecology & Obstetrics*, 2018. 143(3): p. 393–408.
13. Shehadeh J.H. and Hamdan-Mansour A.M., Prevalence and association of premenstrual syndrome and premenstrual dysphoric disorder with academic performance among female university students. *Perspect Psychiatr Care*, 2018. 54(2): p. 176–184. <https://doi.org/10.1111/ppc.12219> PMID: 28543046
14. Girija B. and Veeraiah S., Effect of different phases of menstrual cycle on physical working capacity in Indian population. *Indian j physiol pharmacol*, 2011. 55(2): p. 165–169. PMID: 22319898
